# Supplementary material for: Descriptive analysis of preschool physical activity and sedentary behaviors – a cross sectional study of 3-year-olds nested in the SKOT cohort
Source: Springer Nature journal article supplement (doi:10.1186/s12889-017-4521-3), 2017-06-30
Supplement: MOESM2 [file 12496560]

**Supplementary Table 2.** Wear-time (hours per day) and mean total physical activity levels across settings

|                   |     |                  | Wear time |           | Mean total PA (CPM) |           |
|-------------------|-----|------------------|-----------|-----------|---------------------|-----------|
|                   | n   | n <sub>nap</sub> | nap-      | nap+      | nap-                | nap+      |
| <b>Girls</b>      |     |                  |           |           |                     |           |
| All days, overall | 113 | 73               | 12.4±0.9  | 12.6±0.7  | 562±138             | 506±121*  |
| Sick days         | 11  | 8                | 12.5±2.3  | 12.2±2.3  | 260±17              | 340±138   |
| DC-day            | 92  | 59               | 12.5±0.8  | 12.6±1.1  | 583±139             | 518±146*  |
| DC-day, before DC | 92  | 59               | 1.6±0.7   | 1.6±0.6   | 337±120             | 359±115   |
| DC-day, in DC     | 93  | 59               | 6.7±1.0   | 6.3±1.3   | 636±198             | 544±195*  |
| DC-day, after DC  | 92  | 59               | 4.2±1.1   | 4.7±1.2** | 569±163             | 520±172   |
| Non-DC-day        | 109 | 72               | 12.4±1.3  | 12.6±0.7  | 560±165             | 499±133** |
| <b>Boys</b>       |     |                  |           |           |                     |           |
| All days, overall | 109 | 81               | 12.6±0.8  | 12.6±0.8  | 569±83              | 587±136   |
| Sick days         | 10  | 8                | 12.8±1.1  | 12.1±1.1  | 492±87              | 429±199   |
| DC-day            | 92  | 68               | 12.6±1.0  | 12.5±1.0  | 596±102             | 594±143   |
| DC-day, before    | 91  | 67               | 1.6±0.6   | 1.7±0.6   | 398±146             | 368±112   |
| DC-day, in DC     | 92  | 68               | 6.8±1.2   | 6.4±1.2   | 692±137             | 640±189   |
| DC-day, after DC  | 92  | 68               | 4.2±1.0   | 4.5±1.0   | 508±107             | 598±250*  |
| Non-DC-day        | 107 | 79               | 12.5±1.1  | 12.6±1.1  | 540±109             | 571±159   |

CPM: Counts per minute, DC: Daycare, n<sub>nap</sub>: indicates number of children napping during daytime, nap-: children not napping during daytime, nap+: children napping during daytime. \*: significant different compared with children not napping during daytime.

\*\* : borderline significant different compared with children not napping during daytime.
