# Supplementary material for: Descriptive analysis of preschool physical activity and sedentary behaviors – a cross sectional study of 3-year-olds nested in the SKOT cohort
Source: BMC Public Health. 2017 Jun 30;17:613. doi: 10.1186/s12889-017-4521-3 (PMC5493126; doi:10.1186/s12889-017-4521-3)
Supplement: Supplementary file 1 — Subject’s characteristics, included in analyses vs. non-included. Comparisons of characteristics between subjects included in analyses and non-included subjects. (PDF 44 kb) [file 12889_2017_4521_MOESM1_ESM.pdf]

**Supplementary Table 1.** Subject's characteristics, included in analyses vs. non-included

|                                                               | <b>Included</b> | <b>Non-included</b> | <b>P</b> |
|---------------------------------------------------------------|-----------------|---------------------|----------|
|                                                               | (n=231)         | (n=39)              |          |
| Age (months)                                                  | 36.4±1.06       | 37.0±1.28           | 0.2      |
| Sex (% boys)                                                  | 49.4            | 54.0                | 0.4      |
| Height (cm)                                                   | 95.7±3.42       | 97.0±3.51           | 0.04     |
| Weight (kg)                                                   | 14.5±1.51       | 15.0±1.45           | 0.002    |
| Body mass index (kg/m <sup>2</sup> )                          | 15.8±1.14       | 16.5±0.96           | 0.0006   |
| Body mass index-for-age-Z                                     | 0.23±0.86       | 0.77±0.72           | 0.0004   |
| % overweight (BMI <sub>♂</sub> >17.9, BMI <sub>♀</sub> >17.6) | 6.5             | 11.1                | 0.3      |
| % obese (BMI <sub>♂</sub> >19.6, BMI <sub>♀</sub> >19.4)      | 0               | 0                   |          |
| Highest educational level, mother                             |                 |                     |          |
| Gymnasium/high school or lower secondary school education (%) | 3.9             | 9.1                 | 0.10     |
| Trainee or vocational education (%)                           | 8.7             | 14.1                |          |
| Short academic education (<3 years) (%)                       | 11.3            | 6.1                 |          |
| Medium length academic education (3-4 years) (%)              | 35.5            | 30.3                |          |
| Long academic education (>4 years) (%)                        | 40.7            | 40.4                |          |

Data are means ±standard deviations unless stated otherwise. Differences between included vs. non-included subjects are tested by un-paired t-tests or Pearson's Chi-squared-test as appropriate.
